# Supplementary material for: Harmonization of Next-Generation Sequencing Procedure in Italian Laboratories: A Multi-Institutional Evaluation of the SiRe® Panel
Source: PubMed Central journal article supplement (PMC7078327; doi:10.3389/fonc.2020.00236), 2020-03-11
Supplement: Data_Sheet_1.pdf [file Data_Sheet_1.pdf]

**Smart Protocol for manual library preparation on Ion Torrent  
platforms**

**SiRe®**

The logo for SiRe, featuring the letters 'S', 'i', 'R', and 'e' in a stylized, orange, sans-serif font. The 'i' is smaller and positioned between the 'S' and 'R'. A vertical wavy line is integrated into the stem of the 'i'.

**For Tissue samples**

Before starting:

- Quantify genomic DNA and eventually dilute at 20 ng/μl. If DNA concentration is < 20 ng/μl add a DNA input from 2 to 6 μL.
- Before the use equilibrate reagents at room temperature for 20 min.
- Briefly vortex and spin the reagents.

*Amplification Step*

- Prepare a PCR reaction following the table:

| Reagents            | Volume              | Storage temperature |
|---------------------|---------------------|---------------------|
| Master Mix          | 4 μL                | -30°C to -10°C      |
| SiRe® (2X)          | 10 μL               | -30°C to -10°C      |
| DNA                 | 1-6 μL              | -30°C to -10°C      |
| Nuclease-free Water | 6 – DNA volume (μL) | T.A.                |

- To amplify target regions, run the following program

| Stage       | Step              | Temperature | Time   |
|-------------|-------------------|-------------|--------|
| Hold        | Activate enzyme   | 99°C        | 2 min  |
| Cicles (26) | Denaturate        | 99°C        | 15 sec |
|             | Anneal and extend | 60°C        | 4 min  |
| Hold        |                   | 10°C        | Hold   |

### *Endonuclease digestion*

*NOTE:* Enzyme Reagent is viscous. Pipet slowly and mix thoroughly. Perform this step on ice or a cold block, then quickly proceed to incubation.

- Spin the samples;
- Add 2  $\mu\text{L}$  di endonuclease to each amplified sample. The total volume is  $\sim 22 \mu\text{L}$ .
- load in the thermal cycler, then run the following program:

| Temperature | Time               |
|-------------|--------------------|
| 50°C        | 10 min             |
| 55°C        | 10 min             |
| 60°C        | 20 min             |
| 10°C        | $\leq 1 \text{ h}$ |

- Store the samples at 10°C before  $\leq 1 \text{ h}$  of the last step

*Ligate adapters to the amplicons and purify (not included in **SiRe**® Kit)*

- For each barcode X selected, prepare a mix of Ion P1 Adapter and Ion Xpress™ Barcode X (not provided) at a final dilution of 1:4 for each adapter. For example, combine the volumes indicated in the following table. Scale volumes as necessary. Use 2  $\mu\text{L}$  of this barcode adapter mix in step below. (For any detail refer to Thermofisher specific manual)

| Reagents              | Volume          |
|-----------------------|-----------------|
| Ion P1 Adapter        | 2 $\mu\text{L}$ |
| Ion Xpress™ Barcode X | 2 $\mu\text{L}$ |
| Nuclease-free Water   | 4 $\mu\text{L}$ |

*NOTE:* Store diluted adapters at  $-20^\circ\text{C}$ . Barcode diluted must be used in 30 days.

Vortex and centrifuge Switch solution and diluted barcodes; only centrifuge DNA ligase.

Add reagents as follows:

| Order of addition | Reagents        | Volume          |
|-------------------|-----------------|-----------------|
| 1°                | Switch Solution | 4 $\mu\text{L}$ |
| 2°                | Barcodes X      | 2 $\mu\text{L}$ |
| 3°                | DNA Ligasi      | 2 $\mu\text{L}$ |

*NOTE:* Total volume (including  $\sim 22 \mu\text{L}$  of digested amplicon).

- Vortex and spin the samples;
- Load in the thermal cycler, then run the following program:

| Temperature | Time   |
|-------------|--------|
| 22°C        | 30 min |
| 68°C        | 5 min  |
| 72°C        | 5 min  |
| 10°C        | ≤ 1 h  |

- Samples can be stored for up to 24 hours at 10°C on the thermal cycler. For longer periods, store at –20°C.

### *Libraries purification*

Prepare two falcons of 10 ml freshly prepared 70% ethanol

- add 45 µL (1.5X sample volume) of Agencourt™ AMPure™ XP Reagent (not provided) to each library. Pipet up and down 5 times to mix the bead suspension with the DNA thoroughly.
- Incubate the mixture for 5 minutes at room temperature.
- Place the tubes in a magnetic rack, then incubate for 2 minutes or until solution clears. Carefully remove, then discard the supernatant without disturbing the pellet.
- Add 150 µL of freshly prepared 70% ethanol, then move the plate side-to-side in the two positions of the magnet to wash the beads. Carefully remove, then discard the supernatant without disturbing the pellet.
- Repeat step 5 for a second wash
- Ensure that all ethanol droplets are removed from the wells. Keeping the tubes in the magnet, air-dry the beads at room temperature for 5 minutes. Do not overdry.

NOTE: Dilute Agencourt™ AMPure™XP in a low bind 1,5 ml tube and store at+4°C, before the use equilibrate at R.T , vortex 1 min and centrifuge.

NOTE: Agencourt™ AMPure™XP, ethanol are not included in the kit.

### *Library Amplification*

- Remove the samples with purified libraries from the magnetic rack, then add 50 µL of Low TE to the pellet to disperse the beads.
- Transfer samples in magnetic rack for 5 min.

- Transfer 50 µl of supernatant in a new 0,2 ml tube. centrifuge, load in the thermal cycler, then run the following program :

| Stage   | Temperature | Time   |
|---------|-------------|--------|
| Hold    | 98°C        | 2 min  |
| 5 Cicli | 98°C        | 15 sec |
|         | 60°C        | 1 min  |
| Hold    | 10°C        | ∞      |

NOTE: Stopping point. It is possible to store samples at 20°C for 30 days

- Perform a two-round purification process with the Agencourt™ AMPure™ XP Reagent:
- Transfer samples in a new low bind 1,5 ml tube.
- Add 25 µL (0.5X sample volume) of Agencourt™ AMPure™ XP Reagent to each sample containing ~50 µL of sample. Mix the bead suspension with the DNA thoroughly by pipetting up and down 5 times.
- Incubate the mixture for 5 minutes at room temperature.
- Place the samples in a magnet for at least 5 minutes, or until the solution is clear.
- Carefully transfer the supernatant from each tube to a new low bind 1,5 ml tube without disturbing the pellet.
- To the supernatant add 60 µL (1.2X original sample volume) of Agencourt™ AMPure™ XP Reagent. Pipet up and down 5 times to mix the bead suspension with the DNA thoroughly.
- Incubate the mixture for 5 minutes at room temperature
- Place the samples in the magnetic rack for 3 minutes or until the solution is clear. Carefully remove, then discard the supernatant without disturbing the pellet.
- Add 150 µL of freshly prepared 70% ethanol to each tube, then move the tubes side to side in the magnet to wash the beads. Remove, then discard the supernatant without disturbing the pellet.
- Repeat this step for a second wash removing supernatant.
- Ensure that all ethanol droplets are removed from the tubes. Keeping the tubes in the magnet, air-dry the beads at room temperature for 5 minutes. Do not overdry.
- Remove the tubes from the magnet, then add 50 µL of Low TE to the pellet to disperse the beads.
- Keeping tubes in magnet, transfer supernatant in a new low binding tube 1,5 ml.

Suggested - Qubit™ Fluorometer: Quantify the library and calculate the dilution factor

- Analyze 10 µL of each amplified library using a Qubit™ Fluorometer and the Qubit™ dsDNA HS Assay Kit.
- Combine 10 µL of the amplified Ion AmpliSeq™ library with 190 µL of dye reagent, mix well, then incubate for at least 2 minutes in a 0,5 ml tube.
- Measure the concentration on the Qubit™ Fluorometer.
- Calculate the concentration of the undiluted library by multiplying by 20
- Based on the calculated library concentration, determine the dilution that results in a concentration of ~100 pM:

NOTE: STOPPING POINT. Libraries can be stored at +4 °C for 15 days

(Please to proceed refer to specific platform manual)
